# Supplementary material for: Anisotropically organized three-dimensional culture platform for reconstruction of a hippocampal neural network
Source: PubMed Central journal article supplement (PMC5296669; doi:10.1038/ncomms14346), 2017-02-01
Supplement: ncomms14346-s1.pdf [file ncomms14346-s1.pdf]

1 **Supplementary Figures**

**a** Pre-stretched

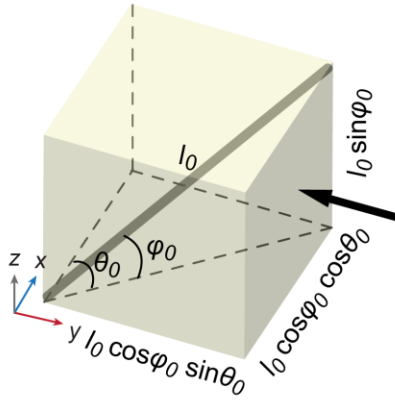

Compressed by release of strain

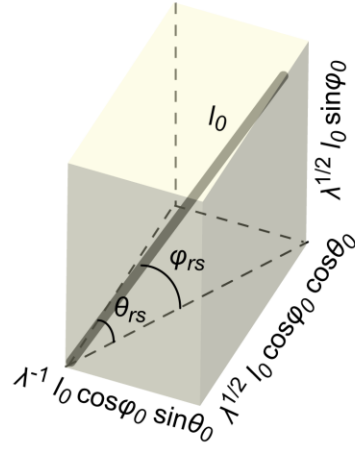

**b**

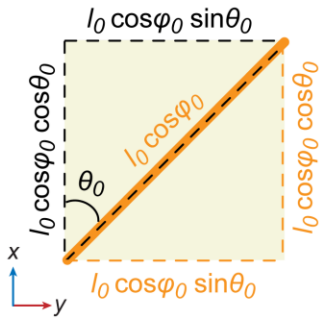

$\lambda^{-1} l_0 \cos \phi_0 \sin \theta_0$

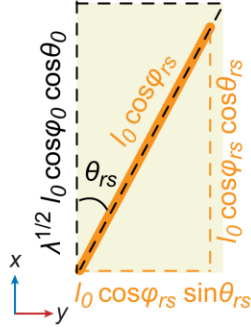

**e**

$$\theta_{rs} = \text{atan}(\lambda^{-1.5} \tan \theta_0)$$

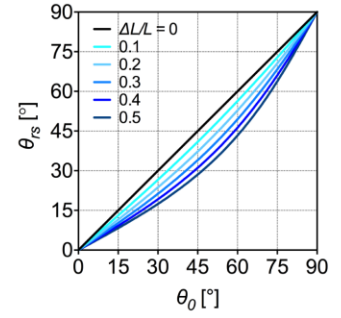

**c**

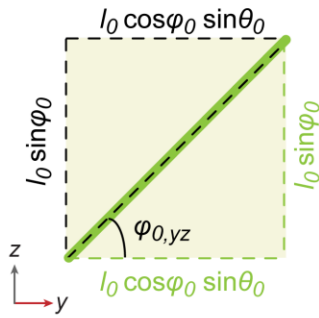

$\lambda^{-1} l_0 \cos \phi_0 \sin \theta_0$

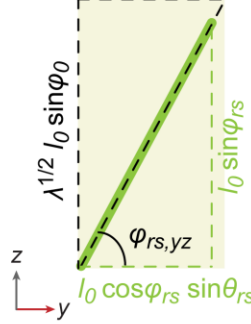

**f**

$$\phi_{rs,yz} = \text{atan}(\lambda^{1.5} \tan \phi_{0,yz})$$

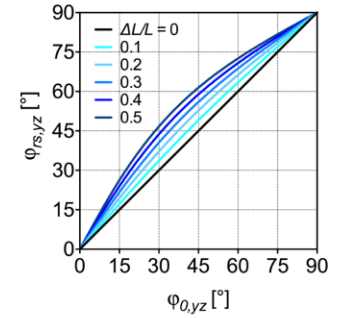

**d**

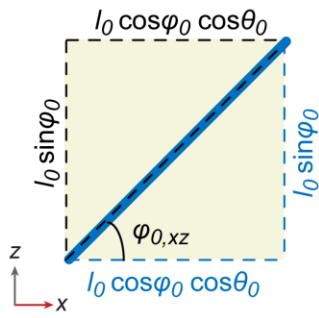

$\lambda^{1/2} l_0 \cos \phi_0 \cos \theta_0$

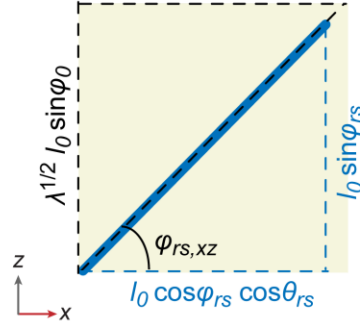

**g**

$$\phi_{rs,xz} = \text{atan}(\tan \phi_{0,xz})$$

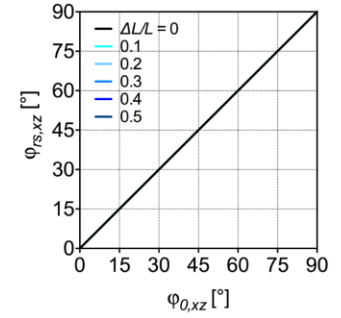

1 **Supplementary Figure 1. Analytical model for anisotropic orientation of collagen fibrils in**  
2 **3D matrix (pre-stretching). a**, Schematic illustrating a collagen fibril (dark gray line) in a 3D  
3 viscoelastic matrix (cube) that is pre-stretched (*left*) and deformed by release of strain (*right*).  
4 Black arrow indicates the direction of axial strain exerted along y-axis in order to restore the pre-  
5 deformed matrix into original configuration.  $l_0$  depicts length of a collagen fibril.  $\theta$  and  $\varphi$  denote  
6 azimuthal and polar angles of the collagen fibril, respectively.  $\lambda$  is the magnitude of non-linear  
7 elastic deformation defined as  $1+\varepsilon_{\text{pre}}$ , where  $\varepsilon_{\text{pre}}$  is the magnitude of strain (i.e.,  $\Delta L/L$ ).  
8 Subscriptions of  $\theta$  and  $rs$  denote pre-deformed and restored states, respectively. **b-d**, Orientation  
9 of the collagen fibril before (*left*) and after (*right*) release of strain is projected on  $xy$  (**b**; orange),  
10  $yz$  (**c**; green), and  $xz$  (**d**; blue) planes. **e-g**, Plots of azimuthal and polar angles after releasing  
11 strain corresponding to illustrations presented on left (**b-d**). Values were calculated from  
12 analytical models shown on left for each plot.  
13  
14

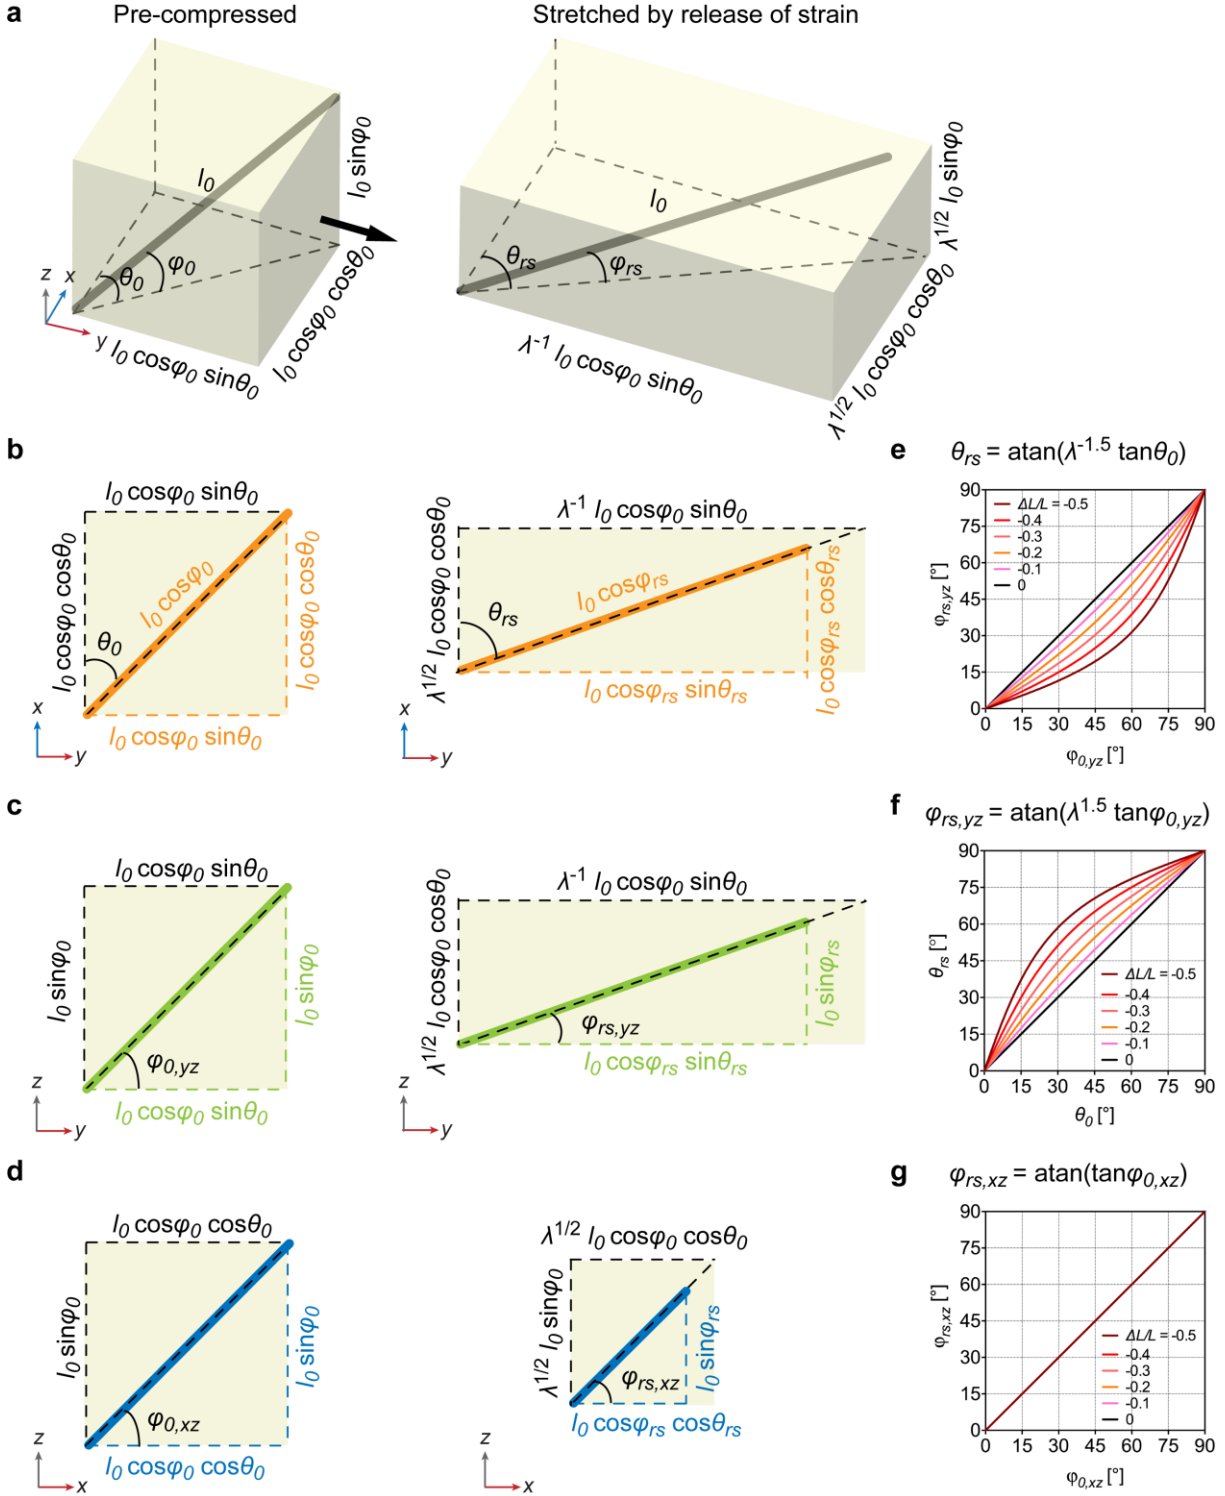

1

2

3 **Supplementary Figure 2. Analytical model for anisotropic orientation of collagen fibrils in**

4 **3D matrix (pre-compression). a, Schematic illustrating a collagen fibril (dark gray line) in a 3D**

1 viscoelastic matrix (cube) that is pre-compressed (*left*) and deformed by release of strain (*right*).  
2 Black arrow indicates the direction of axial strain exerted along y-axis in order to restore the pre-  
3 deformed matrix into original configuration.  $l_0$  depicts length of a collagen fibril.  $\theta$  and  $\varphi$  denote  
4 azimuthal and polar angles of the collagen fibril, respectively.  $\lambda$  is the magnitude of non-linear  
5 elastic deformation defined as  $1+\varepsilon_{\text{pre}}$ , where  $\varepsilon_{\text{pre}}$  is the magnitude of strain (i.e.,  $\Delta L/L$ ).  
6 Subscriptions of  $\theta$  and  $r_s$  denote pre-deformed and restored states, respectively. **b-d**, Orientation  
7 of the collagen fibril before (*left*) and after (*right*) release of strain is projected on  $xy$  (**b**; orange),  
8  $yz$  (**c**; green), and  $xz$  (**d**; blue) planes. **e-g**, Plots of azimuthal and polar angles after releasing  
9 strain corresponding to illustrations presented on left (**b-d**). Values were calculated from  
10 analytical models shown on left for each plot.

11

12

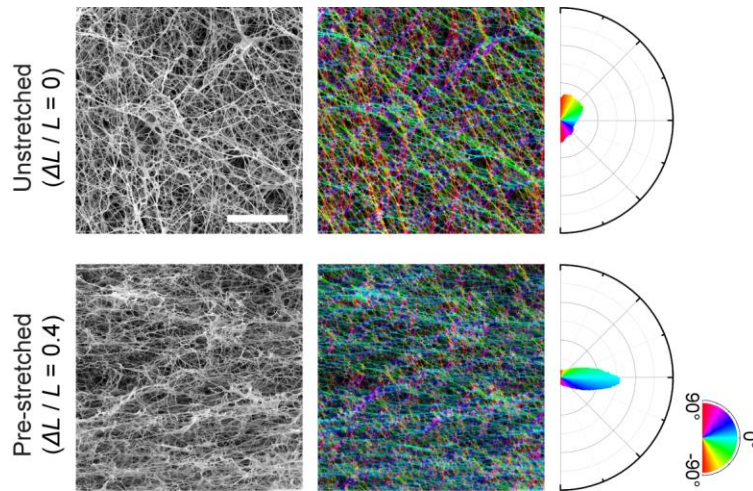

1

2 **Supplementary Figure 3. Scanning electron microscope images of collagen fibrils.** Shown  
 3 are electron micrographs (*left*), color-mapped micrographs (*middle*), and polar frequency  
 4 histograms (*right*) of collagen fibrils in unstretched (*top*;  $\Delta L/L=0$ ) and pre-stretched (*bottom*;  
 5  $\Delta L/L=0.4$ ) PDMS chips. Angular color scales for images and polar frequency histograms are  
 6 identical, and semicircular color index for both is presented in the bottom right corner. Scale bar,  
 7 10  $\mu\text{m}$ .

8

9

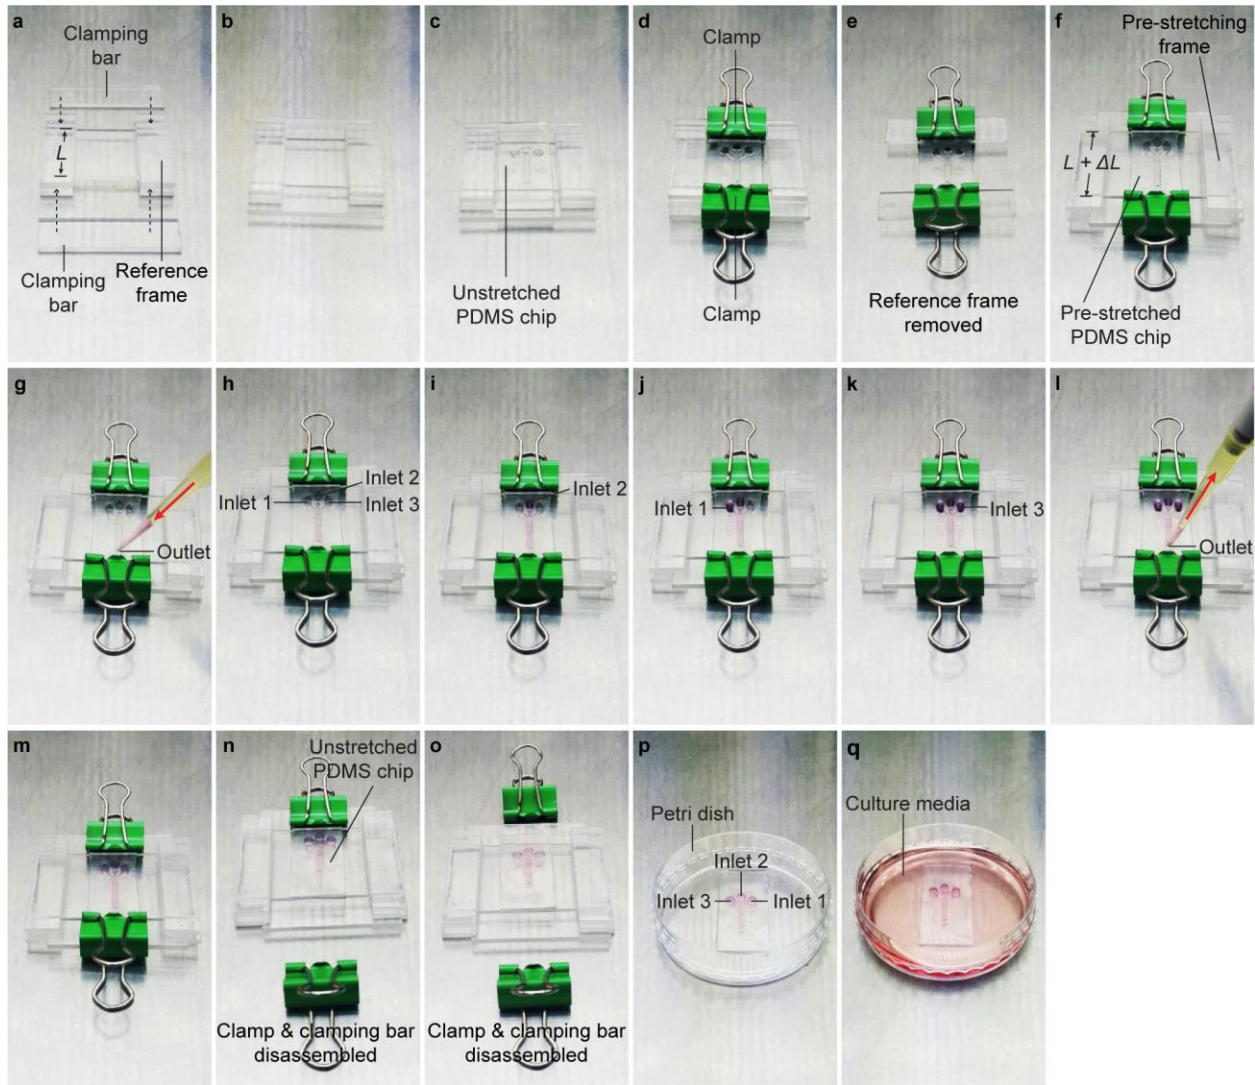

1  
2 **Supplementary Figure 4. Detailed procedure for fabrication of an anisotropically**  
3 **organized, multimodular 3D culture platform.** Photographs of sequential steps to fabricate a  
4 hippocampal neural network using a three-channel PDMS chip by applying axial strain (pre-  
5 stretching). **a**, Two clamping bars and a reference frame (H-shape) to define  $L$ . **b**, The clamping  
6 bars inserted into side grooves of the reference frame. **c**, Placement of an unstretched PDMS chip.  
7 **d**, Fastening of the clamping bars, reference frame, and unstretched PDMS chip with two clamps.  
8 **e**, Removal of the reference frame. **f**, Assembly of the PDMS chip clamped with the clamping  
9 bars into side grooves of pre-stretching frame (H-shape) to deform the PDMS chip (from  $L$  to

1  $L+\Delta L$ ). **g**, Injection of a cell-free collagen solution (*optional*, to prevent bubble formation). **h**,  
2 Cell-free collagen filled to bottom of inlets 1, 2, and 3. **i**, Loading of cell-free collagen into a  
3 reservoir of inlet 2. **j**, Loading of CA1 neuron-seeded collagen into a reservoir of inlet 1. **k**,  
4 Loading of CA3 neuron-seeded collagen into a reservoir of inlet 3. **l**, Withdrawal from outlet. **m**,  
5 Partial gelation for optimal  $t_D$  (5 min). **n**, Release of strain, followed by complete gelation. **o**,  
6 Disassembly of clamp and clamping bar. **p**, Placement of the anisotropically organized,  
7 multimodular 3D culture chip in a Petri dish. **q**, Application of media for further culture.  
8

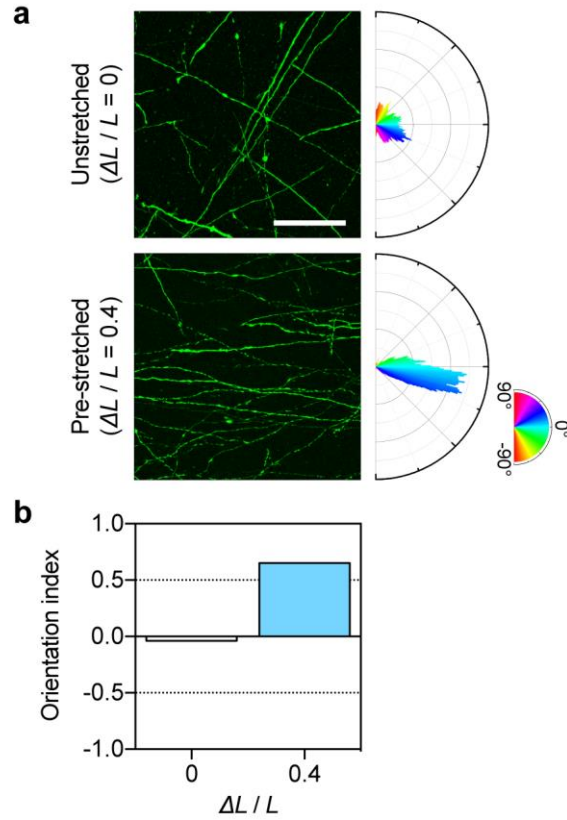

1

2 **Supplementary Figure 5. Alignment of axons in anisotropically organized CA3-CA1**

3 **culture. a**, Maximum intensity projection images (*left*) and polar frequency histograms of the  
 4 orientation angles of axons (*right*) at DIV 21 in unstretched ( $\Delta L/L=0$ ; *top*) and pre-stretched  
 5 ( $\Delta L/L=0.4$ ; *bottom*) PDMS chips (two right panels in Fig. 4e). Semicircular color index for the  
 6 polar frequency histograms is presented in the bottom right corner. Scale bar, 50  $\mu\text{m}$ . **b**,

7 Orientation index of axons in unstretched ( $\Delta L/L=0$ ) and pre-stretched ( $\Delta L/L=0.4$ ) PDMS chips.

8



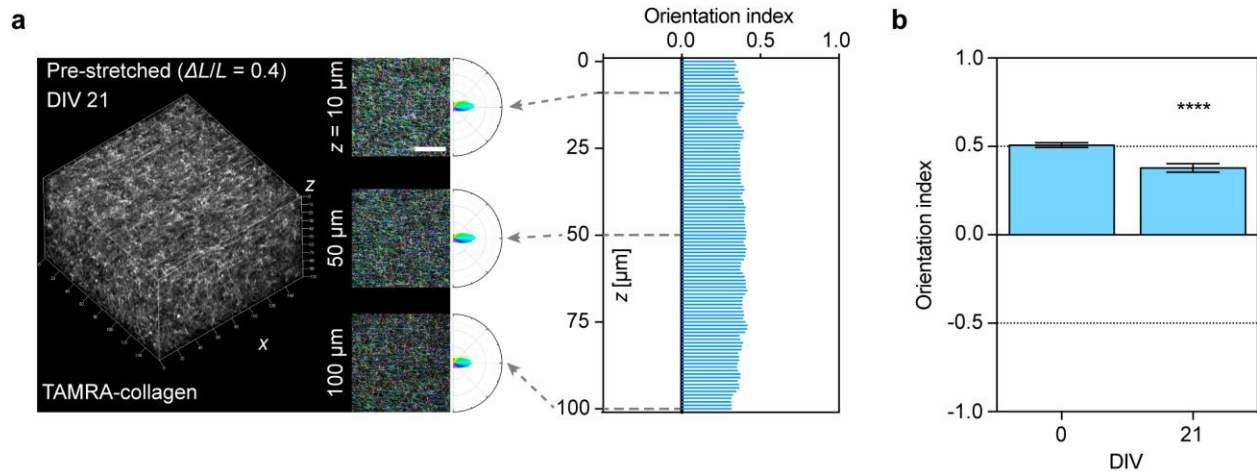

1  
2 **Supplementary Figure 6. Alignment of collagen fibers in cell-seeded, pre-stretched PDMS**  
3 **chips. a**, Confocal fluorescence micrographs (z-stack) of TAMRA-labelled collagen fibrils  
4 rendered in 3D ( $160\ \mu\text{m} \times 160\ \mu\text{m} \times 100\ \mu\text{m}$ ) in a pre-stretched ( $\Delta L/L=0.4$ ), cell-seeded PDMS  
5 chip. Insets on right show color-mapped confocal micrographs of collagen fibrils at depths of 10  
6 (*top*), 50 (*middle*), and 100 (*bottom*)  $\mu\text{m}$ , as indicated. Polar frequency histograms of orientation  
7 angles are presented next to the three micrographs. Angular color scales for images and polar  
8 frequency histograms are identical to Fig. 1b. Scale bar, 50  $\mu\text{m}$ . Graph on right shows orientation  
9 index of collagen fibrils throughout the depth of 100  $\mu\text{m}$ . Gray arrows indicate the  $z$  position  
10 from which orientation indices were calculated. **b**, Orientation index of collagen fibrils averaged  
11 throughout the depth of 100  $\mu\text{m}$  at DIV 0 and DIV 21. Error bars indicate standard deviation  
12 (100 focal planes). \*\*\*\*,  $p < 3.95 \times 10^{-95}$  (unpaired  $t$ -test).

13

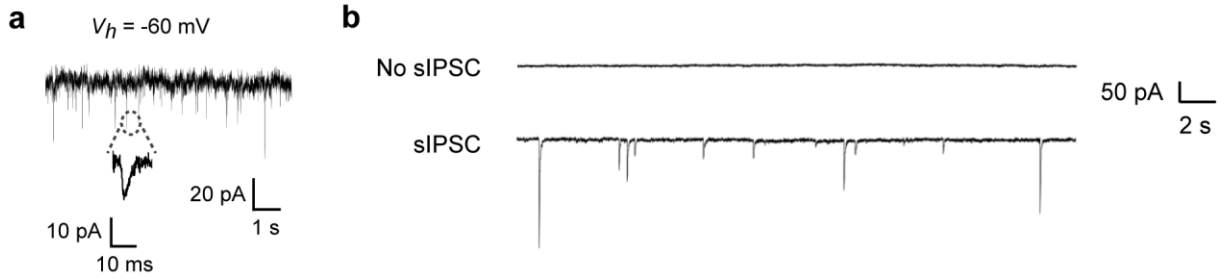

1

2 **Supplementary Figure 7. Measurement of spontaneous postsynaptic currents recorded**  
 3 **from CA1 neurons.** Representative spontaneous excitatory postsynaptic currents (sEPSCs) (**a**)  
 4 and inhibitory postsynaptic currents (sIPSCs) (**b**) from CA1 neurons. *Top trace* in **b**, a trace  
 5 obtained from a CA1 neuron with no sIPSC. *Bottom trace* in **b**, a trace obtained from a CA1  
 6 neuron showing sIPSCs.

7

8

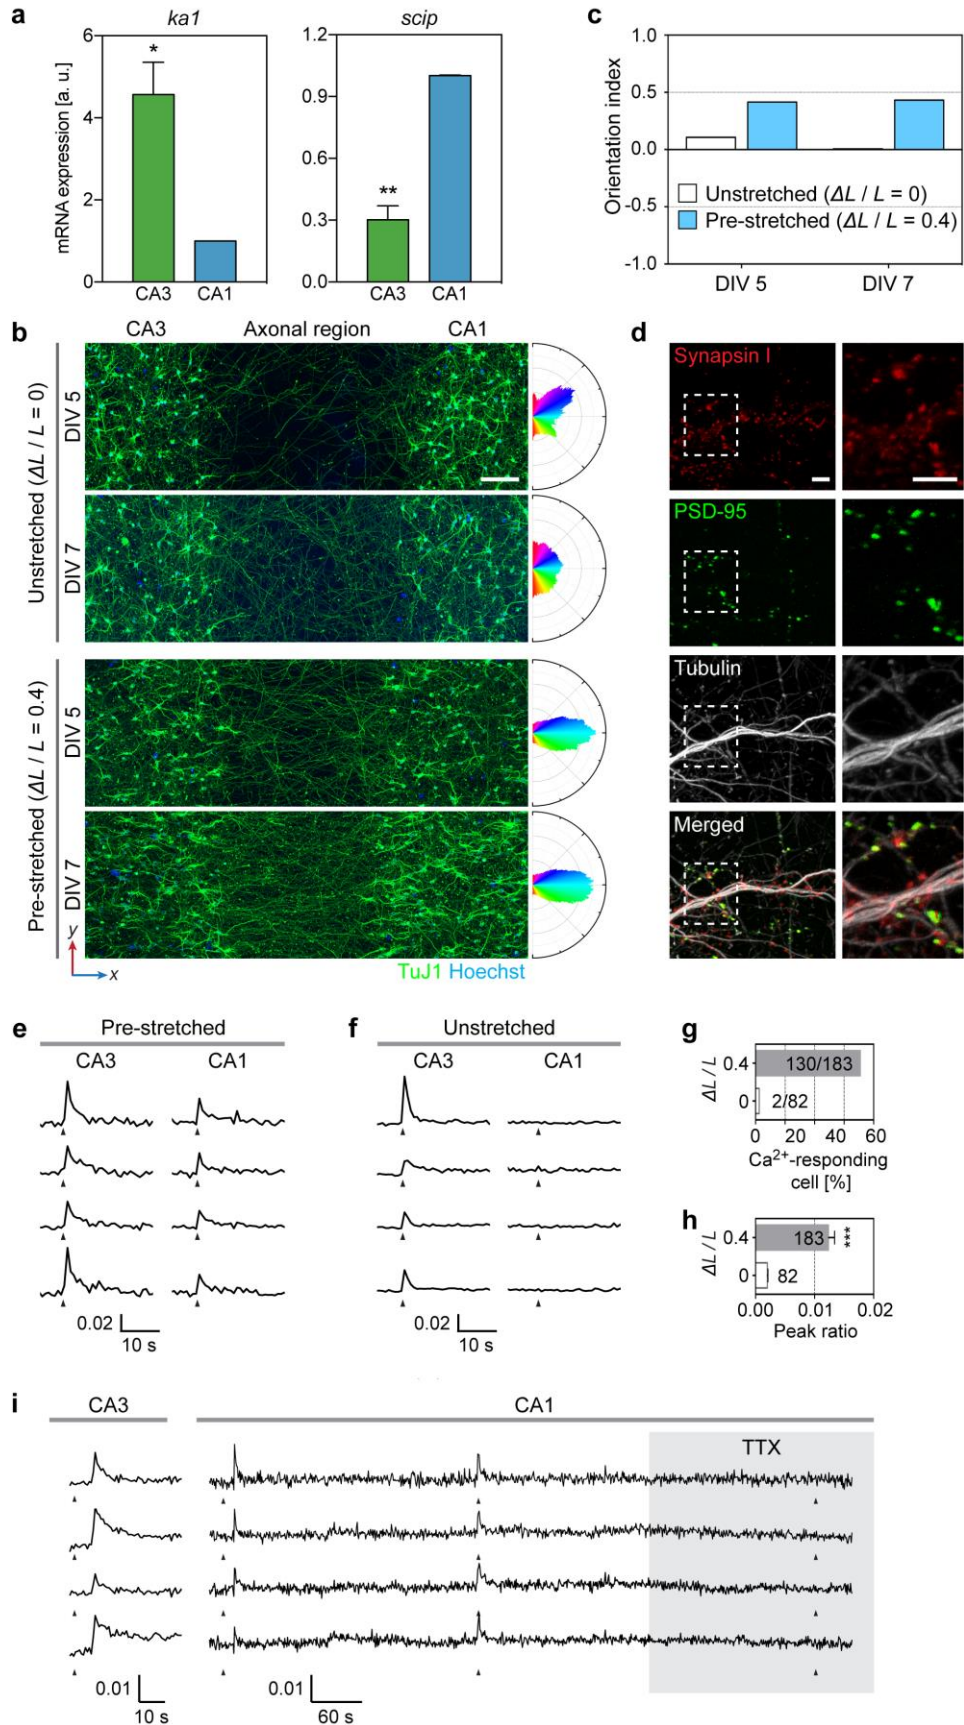

1 **Supplementary Figure 8. Formation of an anisotropically organized CA3-CA1 neural**  
2 **circuit with mouse neurons. a,** Relative expression levels of *kal* (left) and *scip* (right) mRNA  
3 in mouse primary hippocampal neurons isolated from areas CA3 and CA1. Levels are  
4 normalized to *gapdh* mRNA and presented in arbitrary units (a.u.). Error bars indicate standard  
5 error of mean (SEM) ( $n=3$ ). \* and \*\*,  $p=4.50\times 10^{-2}$  (*kal*) and  $9.20\times 10^{-3}$  (*scip*), calculated from  
6 unpaired *t*-tests. **b and c,** Representative confocal fluorescence micrographs of CA3-CA1  
7 cultures in unstretched ( $\Delta L/L=0$ ) and pre-stretched ( $\Delta L/L=0.4$ ) PDMS chips (**b**). Cultures were  
8 immunostained for neurites (TuJ1) at DIV 5 and 7, as indicated. *Right*, Polar frequency  
9 histograms of the orientation angles of neurites in the axonal region. Angular color scales are  
10 identical to Fig. 1**b**. Calculation of orientation indices of neurites in the axonal compartment is  
11 presented in **c**. **d,** Confocal fluorescence micrographs of the CA3-CA1 culture immunostained  
12 for synapsin I, PSD-95 and tubulin. Boxed areas are enlarged on right. Scale bars, 5  $\mu\text{m}$ . **e-i,** A  
13 concentric bipolar electrode was placed in the CA3 region as in Fig. 7**a**. **e and f,** Representative  
14  $\text{Ca}^{2+}$  responses of fura-2/AM-loaded CA3 (left) and CA1 neurons (right), grown either in pre-  
15 stretched (**e**) or un-stretched (**f**) PDMS chips. **g,** Percentage of  $\text{Ca}^{2+}$ -responding cells in the CA1  
16 region growing either in pre-stretched ( $\Delta L/L=0.4$ ) or unstretched ( $\Delta L/L=0$ ) PDMS chips.  
17 Numbers of total and responding cells are indicated. **h,** Average peak ratio of  $\text{Ca}^{2+}$  transients of  
18 CA1 neurons in pre-stretched ( $\Delta L/L=0.4$ ) or unstretched ( $\Delta L/L=0$ ) PDMS chips. Number of cells  
19 pooled from at least three independent recording sessions is indicated. Error bars indicate SEM.  
20 \*\*\*,  $p=5.833\times 10^{-11}$  (*t*-test). **i,** Representative  $\text{Ca}^{2+}$  responses evoked by repetitive electrical  
21 stimulation of CA3 neurons grown in pre-stretched ( $\Delta L/L=0.4$ ) PDMS chips. Traces show  $\text{Ca}^{2+}$   
22 responses in the absence or presence of TTX, as indicated. **e, f, and i,** Triangles indicate  
23 electrical stimulation (1 s, 20 Hz).



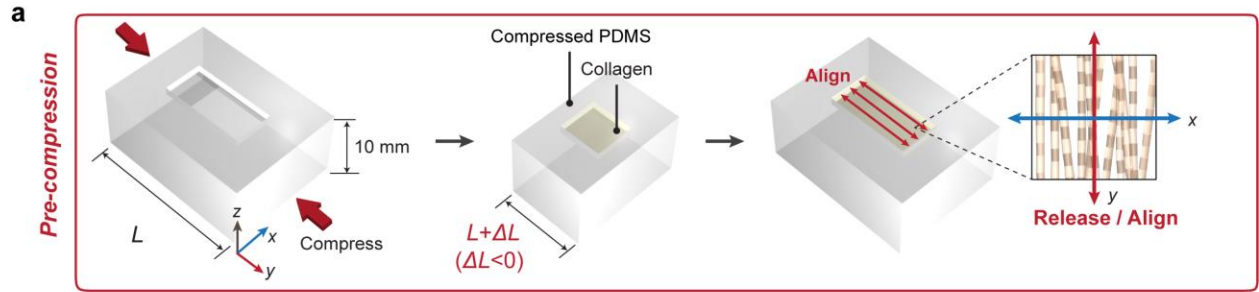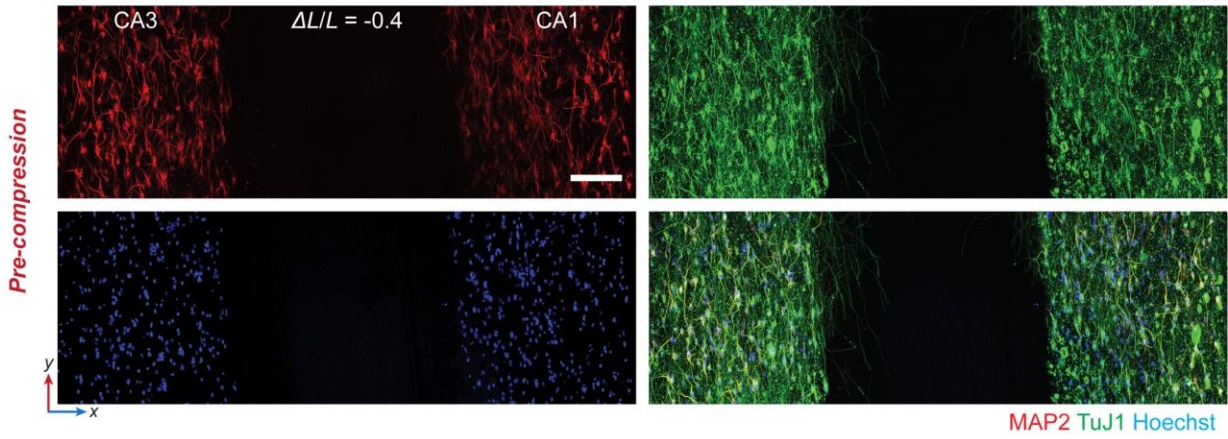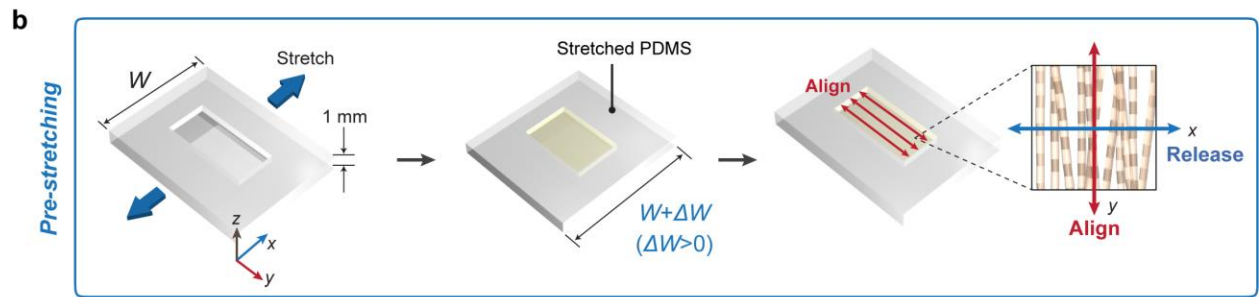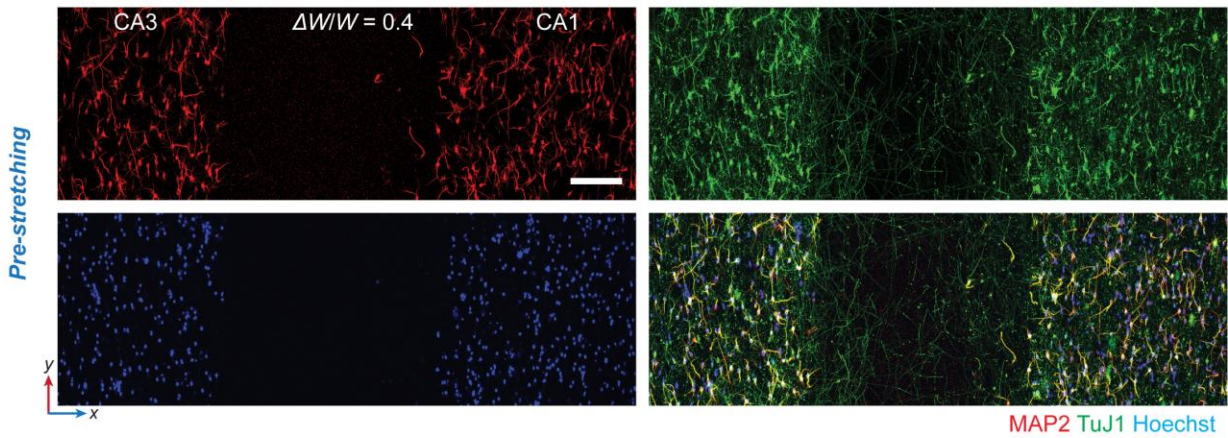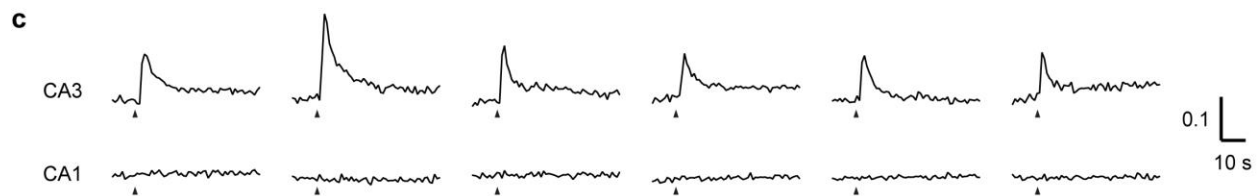

1 **Supplementary Figure 9. Alignment of collagen fibrils along y-axis fails to support CA3-**  
2 **CA1 connectivity.** **a**, *Top*, Schematic for inducing alignment along y-axis by pre-compression of  
3 10 mm-thick PDMS chip along the y-axis. *Bottom*, representative confocal fluorescence  
4 micrographs of the CA3-CA1 culture (DIV 7) showing dendrites (MAP2; red), axons (TuJ1;  
5 green) and nuclei (Hoechst; blue). Scale bar, 200  $\mu\text{m}$ . **b**, *Top*, Schematic for inducing alignment  
6 along y-axis by pre-stretching 1 mm-thick PDMS chip along the x-axis. *Bottom*, representative  
7 confocal fluorescence micrographs of the CA3-CA1 culture (DIV 7) showing dendrites (MAP2;  
8 red), axons (TuJ1; green) and nuclei (Hoechst; blue). Scale bar, 200  $\mu\text{m}$ . **c**, Representative  $\text{Ca}^{2+}$   
9 responses of fura-2/AM-loaded CA3 and CA1 neurons at DIV 22, grown PDMS chips aligned  
10 along y-axis.

11

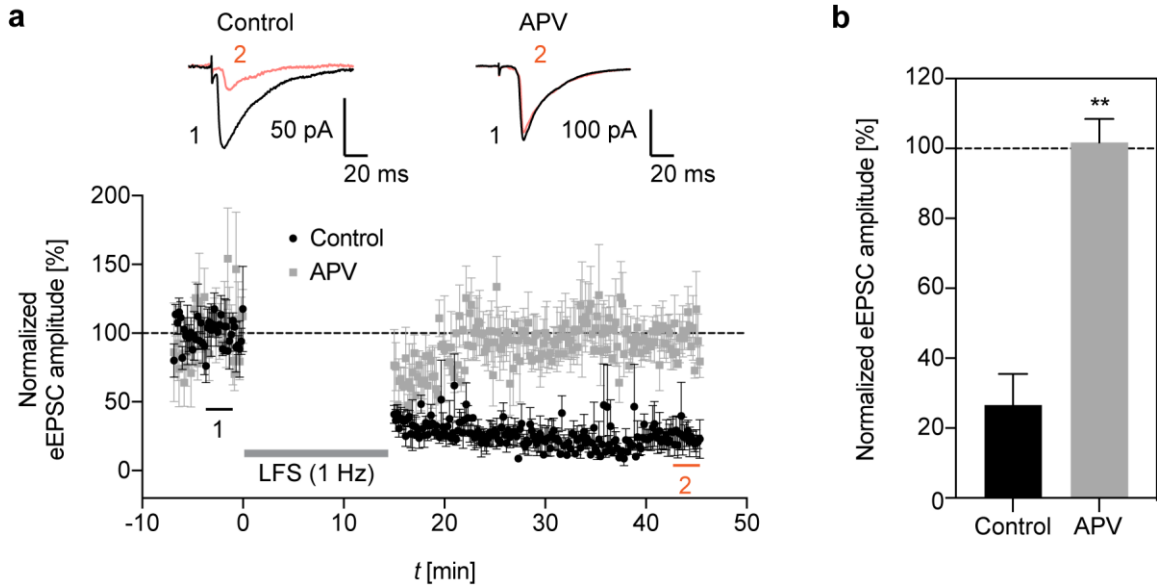

1  
2 **Supplementary Figure 10. Measurement of long-term depression (LTD) in anisotropically**  
3 **organized CA3-CA1 culture. a**, Graphs represent evoked EPSC (eEPSC) amplitude recorded  
4 from CA1 neurons with control solution (black) or APV-containing solution (gray) in each batch  
5 of anisotropically organized 3D culture. The LTD was induced by stimulation at 1 Hz for 15 min  
6 in the CA3 area. Inset traces represent eEPSCs measured from one neuron during baseline (1)  
7 and at the indicated time after low frequency stimulation (2). Error bars indicate standard error of  
8 mean ( $n=3$  for each). **b**, Relative eEPSCs analyzed at 45 min from **a**. \*\*,  $p=2.56 \times 10^{-3}$  ( $t$ -test).  
9

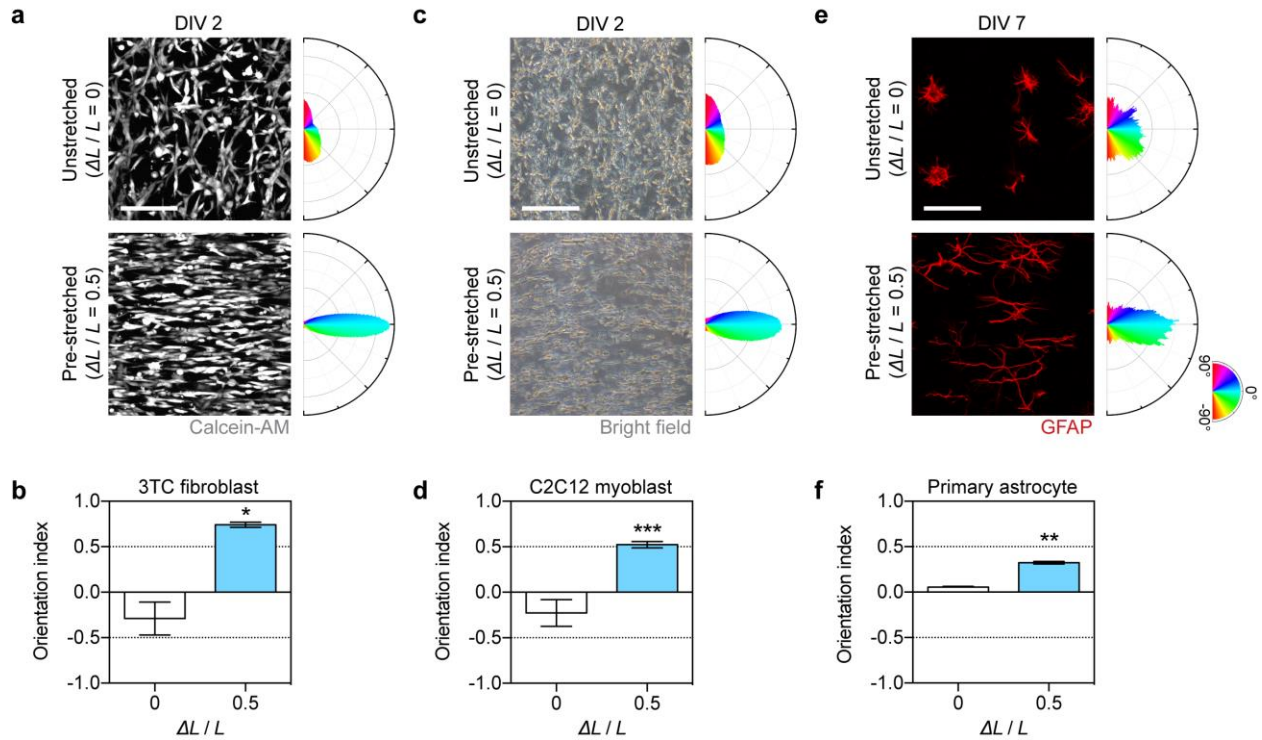

1  
2 **Supplementary Figure 11. Alignment of 3T3 fibroblast, C2C12 myoblasts, and primary**  
3 **astrocytes induced by mechanical deformation of PDMS chips. a, c, and e,** Images of 3T3  
4 fibroblasts (**a**, calcein-AM-loaded images; DIV 2), C2C12 myoblasts (**c**, bright field images;  
5 DIV 2), and primary astrocytes (**e**, GFAP-stained images; DIV 7) growing in unstretched (*top*)  
6 and pre-stretched (*bottom*) PDMS chips. Cell-embedded collagen solutions were loaded into  
7 single-channel PDMS chips, either unstretched ( $\Delta L/L=0$ ,  $t_D=5$  min) or pre-stretched ( $\Delta L/L=0.5$ ,  
8  $t_D=5$  min), following the processes illustrated in Fig. 1a. Polar frequency histograms of the  
9 orientation angles are shown on right. Semicircular color index for the polar frequency  
10 histograms is presented in the bottom right corner. Scale bar, 50 (**a** and **c**) and 100 (**e**)  $\mu\text{m}$ . **b, d,**  
11 **and f,** Orientation indices of 3T3 fibroblasts (**b**), C2C12 myoblasts (**d**), and primary astrocytes (**f**)  
12 growing in unstretched ( $\Delta L/L=0$ ) and pre-stretched ( $\Delta L/L=0.5$ ) PDMS chips. Error bars indicate  
13 standard deviation. \*, \*\*\*, and \*\* denote statistical differences with  $p$  values of  $1.54 \times 10^{-2}$ ,  
14  $1.0 \times 10^{-3}$ ,  $1.9 \times 10^{-3}$ , respectively ( $t$ -tests).
